# Supplementary material
Source: PubMed Central journal article supplement (PMC6724186)

## Supplementary Online Content

Smith-Bindman R, Kwan ML, Marlow EC, et al. Trends in use of medical imaging in US health care systems and in Ontario, Canada, 2000-2016 [published September 3, 2019]. *JAMA*. doi:10.1001/jama.2019.11456

**eFigure 1.** Annual Change in Imaging Rates per 1000 Person-Years by Modality, Age, and Country Based on Joinpoint Analysis Showing the Annual Percent Change in Each Segment and 95% Confidence Intervals Around These Rates

**eFigure 2.** Imaging Rates per 1000 Persons by Modality, Age, Country and Individual Healthcare System

This supplementary material has been provided by the authors to give readers additional information about their work.

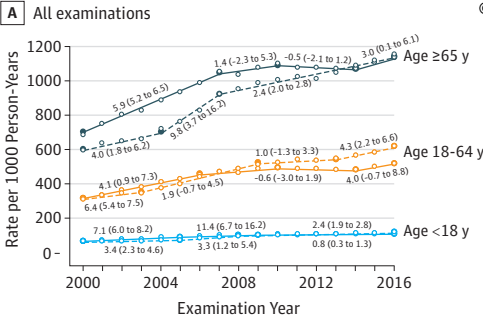

eFigure 1. Annual Change in Imaging Rates per 1000 Person-Years by Modality, Age, and Country Based on Jointpoint Analysis Showing the Annual Percent Change in Each Segment and 95% Confidence Intervals Around These Rates

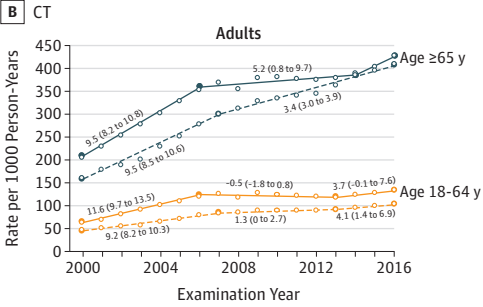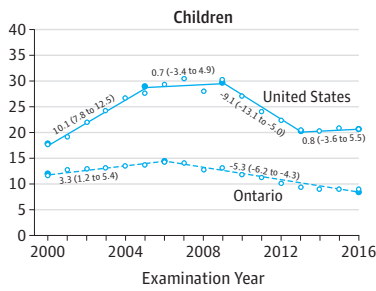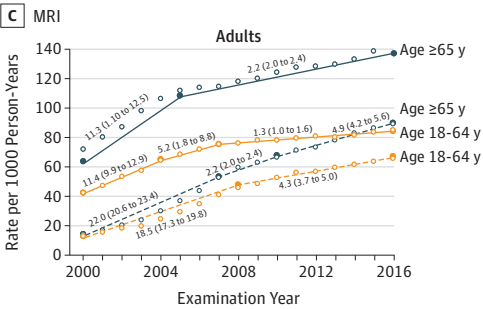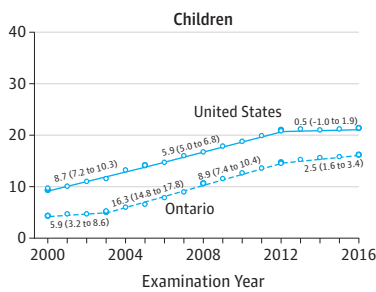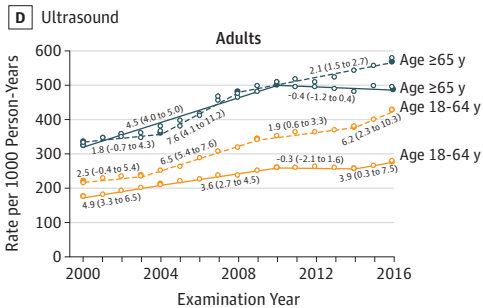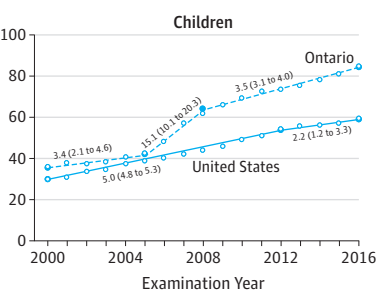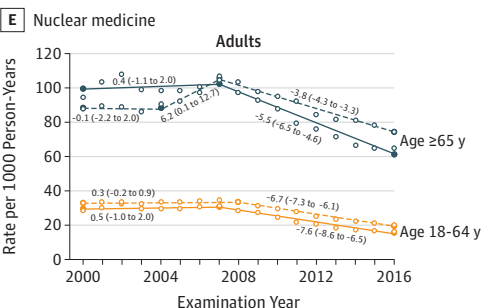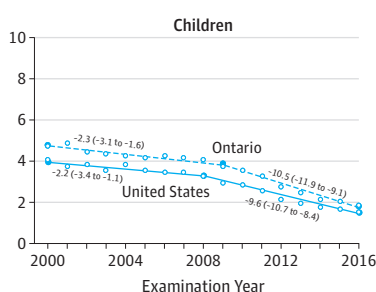

eFigure 2. Imaging rates per 1000 persons by modality, age, country and individual healthcare system. U.S. healthcare systems shown in thick lines. Ontario, Canada in thin lines with triangle.

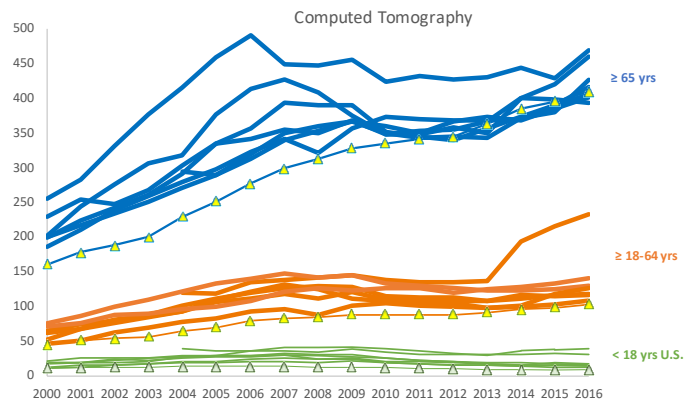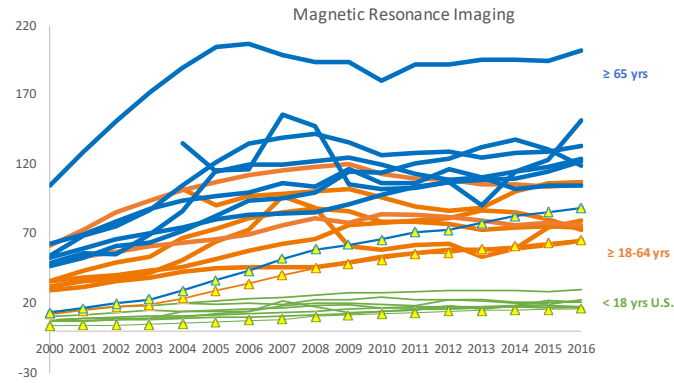

**Key**

- Blue   $\geq 65$  years
- Orange  18-64 years
- Green   $< 18$  years

Thick line U.S., Thin line Ontario, Canada

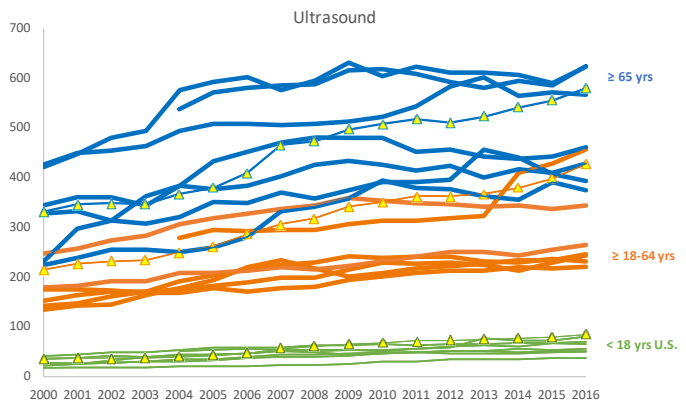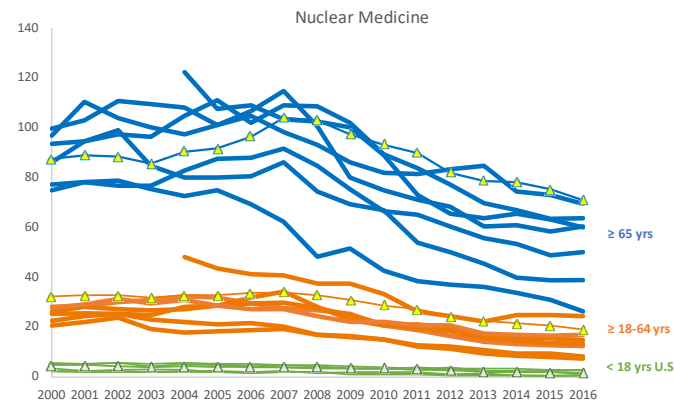

Supplement: jama-322-843-s001.pdf [file jama-322-843-s001.pdf]
